# Supplementary material
Source: PubMed Central journal article supplement (PMC3947186)
Supplement: NIHMS535429-supplement-01.pdf [file NIHMS535429-supplement-01.pdf]

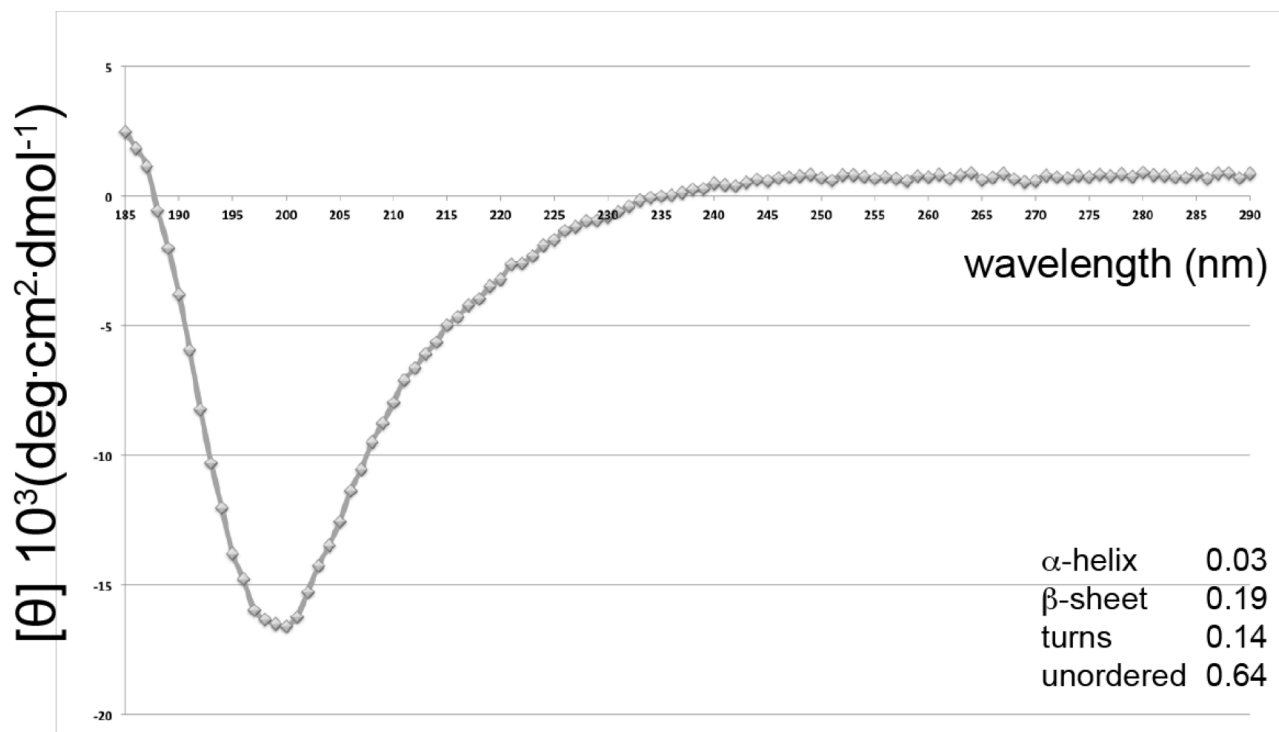

**Fig. S1**

**Figure S1, related to Figure 2C. Secondary structure analysis of KyoT2.** Figure shows far-UV spectroscopy (wavelengths 185-200nm) for KyoT2 (184-210). The CD spectrum has a distinct minimum at 200 nm, characteristic of random coil. Relative amounts of secondary-structure were determined from CD data using Dichroweb and CDSSTR with reference set 7. The normalized root mean square deviation parameter value for analysis of the KyoT2 CD data is 0.012.

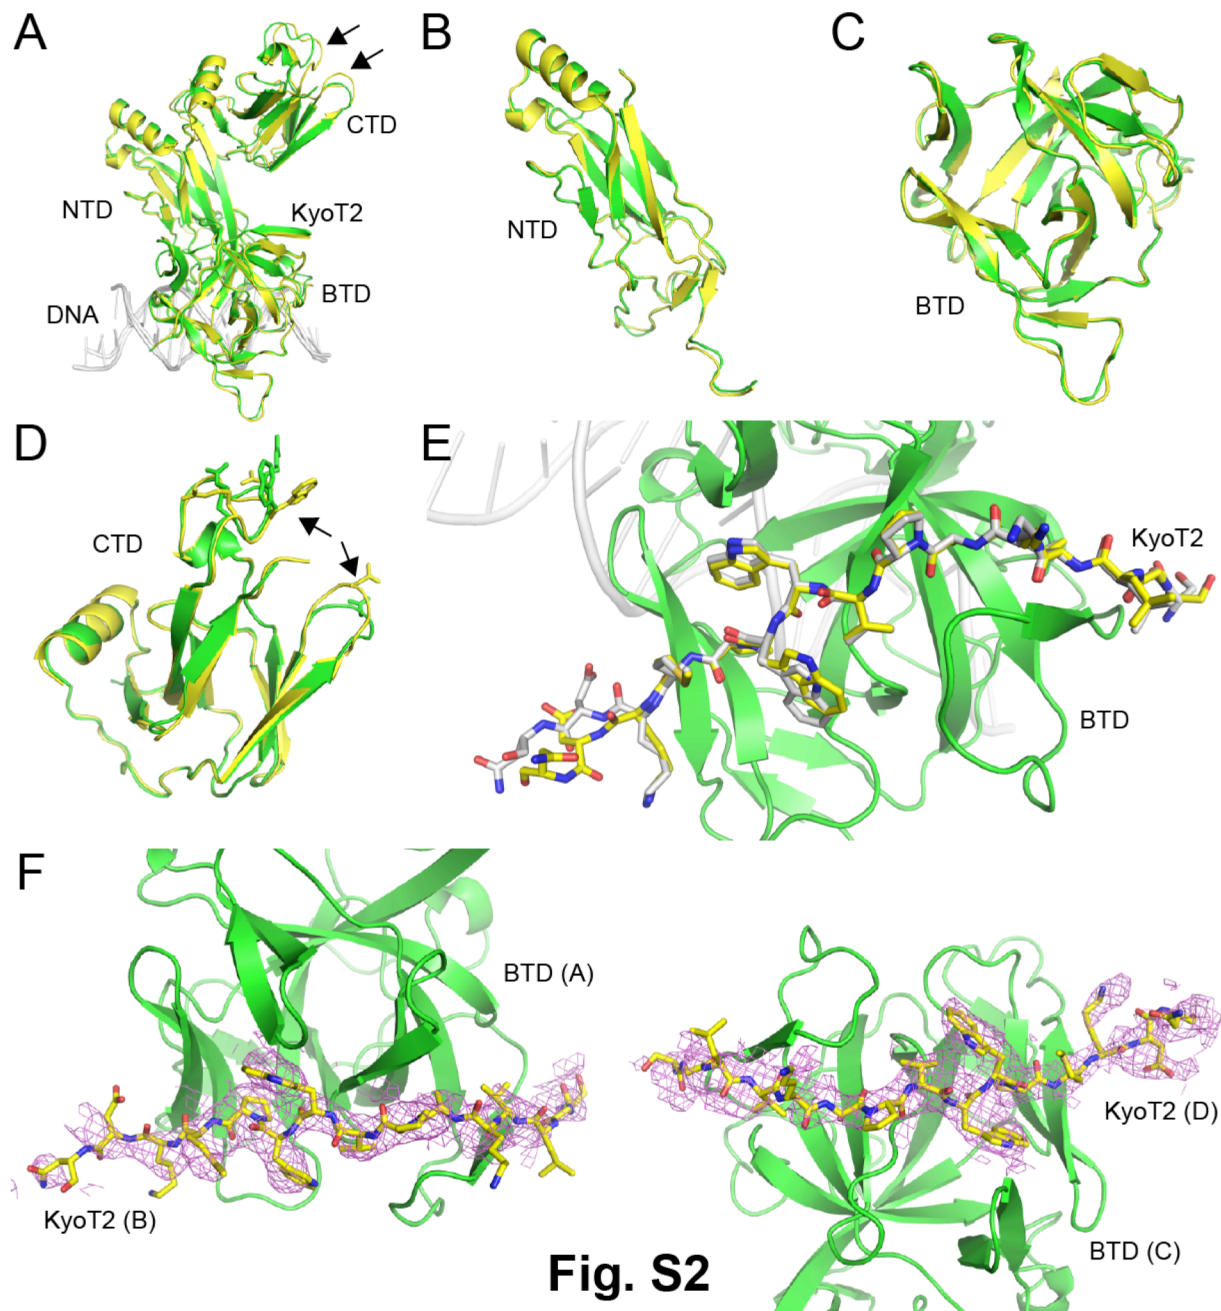

**Fig. S2**

**Figure S2, related to Figure 3. Structural alignment of the two CSL-KyoT2-DNA complexes contained within the asymmetric unit.** Figure shows structural overlay of the two CSL-KyoT2-DNA complexes within the asymmetric unit (AU). (A) Corresponding  $\alpha$  atoms from the two CSL molecules contained within the AU were aligned, exhibiting an overall 0.66 RMSD. (B) Corresponding  $\alpha$  atoms from the NTD from the two CSL molecules contained within the AU were aligned, exhibiting a 0.27 RMSD. (C) Corresponding  $\alpha$  atoms from the BTD from the two CSL molecules contained within the AU were aligned, exhibiting a 0.23 RMSD. (D) Corresponding  $\alpha$  atoms from the CTD from the two CSL molecules contained within the AU were aligned, exhibiting a 0.31 RMSD. (E) Corresponding  $\alpha$  atoms from the two KyoT2 molecules contained within the AU were aligned, exhibiting a 0.24 RMSD. (F) Figure shows 2Fo-Fc density, contoured at  $1\sigma$ , from molecular replacement solution (prior to refinement) for KyoT2 with final refined model. Protein chains are denoted in parentheses. Arrows (panels A & D) indicate structural differences in the CTD between the two complexes within the AU.

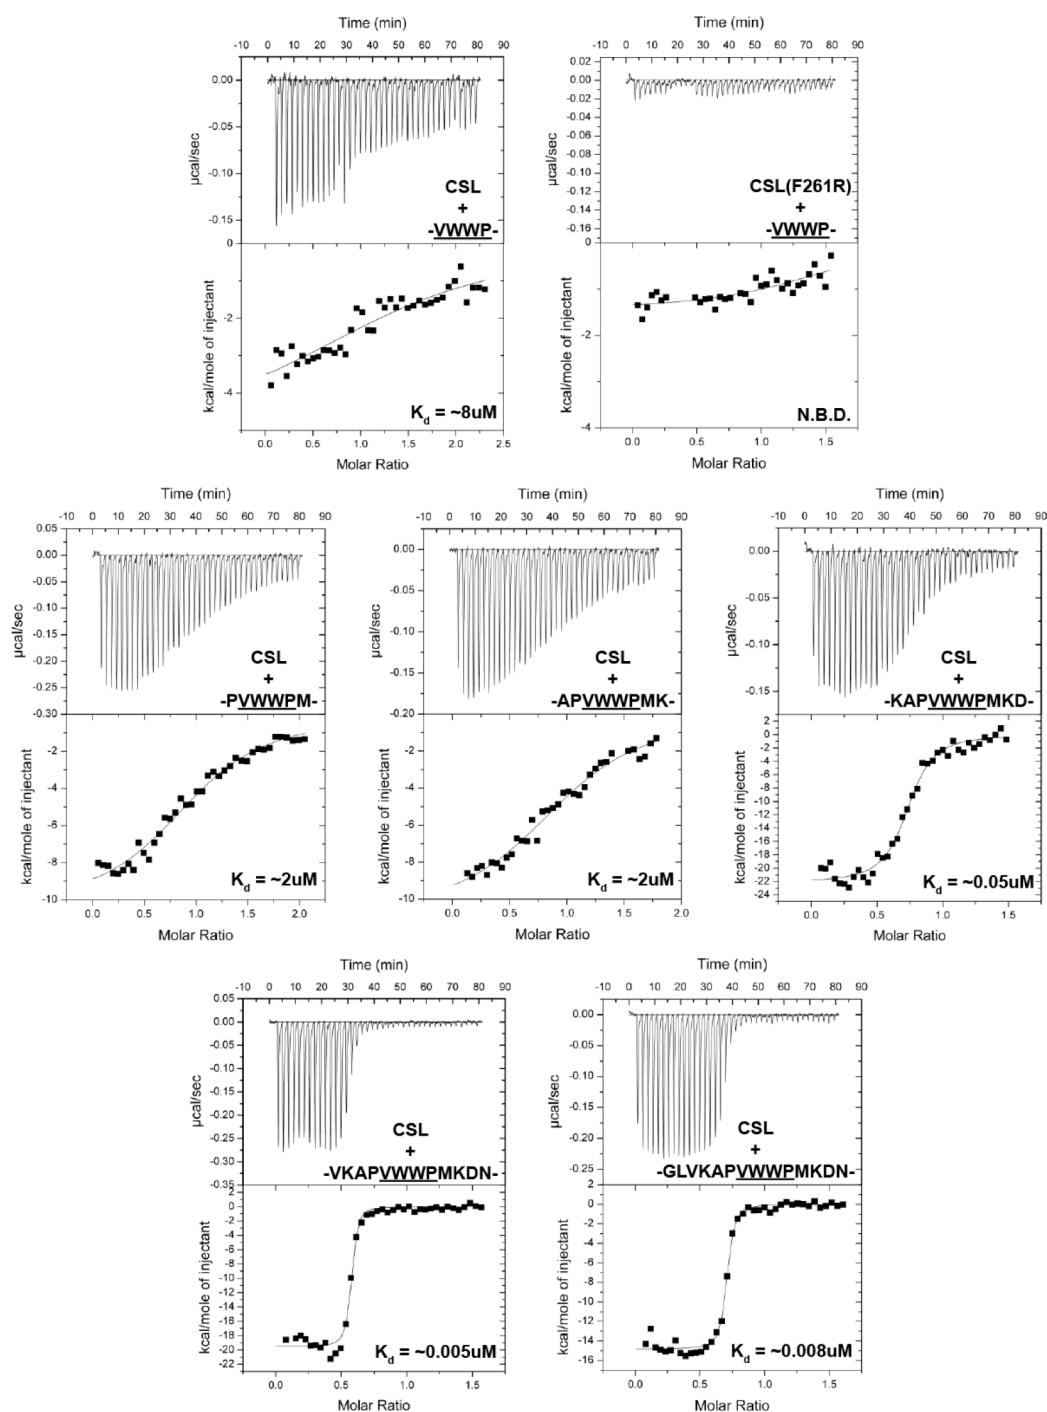

**Figure S3, related to Figure 4. Identification of the minimal KyoT2 peptide that specifically binds CSL.** This figure shows representative thermograms (raw heat signal and nonlinear least squares fit to the integrated data) for wild-type and mutant (F261R) CSL binding to KyoT2 peptides of decreasing lengths. KyoT2 peptide sequences and apparent dissociation constants are denoted on each thermogram. The hydrophobic tetrapeptide motif (-VWWP-) is underlined. Complete thermodynamic binding data is shown in Table S2. NBD=no binding detected.

**Table S1, related to Figure 4F. Buried surface area comparison of CSL-KyoT2 and CSL-RAM complex structures.**

| Complex          | Organism | PDB ID | Total BSA (Å <sup>2</sup> ) | Nonpolar BSA (Å <sup>2</sup> ) | Ratio (NP/Total) |
|------------------|----------|--------|-----------------------------|--------------------------------|------------------|
| CSL – KyoT2      | Mouse    | 4J2X   | 874                         | 602                            | 0.7              |
| CSL – RAM        | Worm     | 3BRD   | 950                         | 654                            | 0.7              |
| CSL – NICD – MAM | Worm     | 2FO1   | 904                         | 536                            | 0.6              |
| CSL – NICD – MAM | Human    | 3V79   | 930                         | 647                            | 0.7              |

**Table S2, related to Table 2. Calorimetric binding analysis of KyoT2 residues required for minimal binding to CSL.**

| CSL   | KyoT2 Ligand     | $K_{app}$ (M <sup>-1</sup> ) | $K_d$ (μM) | $\Delta G_{obs}$ (kcal/mol) | $\Delta H_{obs}$ (kcal/mol) | $-T\Delta S_{obs}$ (kcal/mol) |
|-------|------------------|------------------------------|------------|-----------------------------|-----------------------------|-------------------------------|
| WT    | -VWWP-           | $1.2 \pm 0.6 \times 10^5$    | 8.3        | -6.9                        | $-5.0 \pm 1.0$              | $-1.9 \pm 0.5$                |
| F261R | -VWWP-           | <i>NBD</i>                   | ---        | ---                         | ---                         | ---                           |
| WT    | -PVWWPM-         | $4.6 \pm 0.7 \times 10^5$    | 2.2        | -7.7                        | $-10.4 \pm 0.4$             | $2.7 \pm 0.3$                 |
| WT    | -APVWWPMK-       | $5.7 \pm 1.0 \times 10^5$    | 1.8        | -7.9                        | $-10.8 \pm 0.5$             | $3.0 \pm 0.5$                 |
| WT    | -KAPVWWPMKD-     | $2.1 \pm 0.4 \times 10^7$    | 0.048      | -10.0                       | $-22.2 \pm 0.4$             | $12.2 \pm 0.5$                |
| WT    | -VKAPVWWPMKDN-   | $1.8 \pm 0.5 \times 10^8$    | 0.006      | -11.2                       | $-19.1 \pm 0.2$             | $7.9 \pm 0.9$                 |
| WT    | -GLVKAPVWWPMKDN- | $1.2 \pm 0.3 \times 10^8$    | 0.008      | -11.0                       | $-14.8 \pm 0.1$             | $3.8 \pm 0.6$                 |

All experiments were performed at 25°C. The errors represent the standard deviation of the nonlinear least squares fit of the data to the titration curves. NBD=No Binding Detected.

**Table S3, related to Table 4. Comparison of KyoT2, RAM, and EBNA2 ITC binding data to CSL**

| <b>CSL mutant</b> | <b>Ligand</b> | <b><math>K_d</math><br/>(<math>\mu M</math>)</b> | <b>~fold<br/>difference</b> |
|-------------------|---------------|--------------------------------------------------|-----------------------------|
| WT                | KyoT2         | 0.012                                            | ---                         |
| WT                | RAM (N1)      | 0.022                                            | ---                         |
| WT                | RAM (N2)      | 0.032                                            | ---                         |
| WT                | EBNA2         | 4.6                                              | ---                         |
| F261R             | KyoT2         | 6.3                                              | 525                         |
| F261R             | RAM (N1)      | 15                                               | 682                         |
| F261R             | RAM (N2)      | 9.5                                              | 297                         |
| V263R             | KyoT2         | 0.019                                            | 1.6                         |
| V263R             | RAM (N1)      | 0.43                                             | 20                          |
| V263R             | RAM (N2)      | 3.6                                              | 113                         |
| A284R             | KyoT2         | 7.2                                              | 600                         |
| A284R             | RAM (N1)      | 0.74                                             | 34                          |
| A284R             | RAM (N2)      | 2.5                                              | 78                          |
| Q333R             | KyoT2         | 0.051                                            | 4.3                         |
| Q333R             | RAM (N1)      | 0.38                                             | 17                          |
| Q333R             | RAM (N2)      | 0.20                                             | 6.3                         |

ITC binding data for the RAM domains from Notch1 (N1) and Notch2 (N2) were taken from Yuan, Z., Friedmann, D. R., Vanderwielen, B. D., Collins, K. J., & Kovall, R. A. (2012). Characterization of CSL (CBF-1, Su(H), Lag-1) mutants reveals differences in signaling mediated by Notch1 and Notch2. *The Journal of biological chemistry*, 287(42), 34904–34916. The ITC binding data for EBNA2 were taken from Johnson, S. E., Ilagan, M. X. G., Kopan, R., & Barrick, D. (2010). Thermodynamic analysis of the CSL x Notch interaction: distribution of binding energy of the Notch RAM region to the CSL beta-trefoil domain and the mode of competition with the viral transactivator EBNA2. *The Journal of biological chemistry*, 285(9), 6681–6692.
